# Supplementary material
Source: publisher figshare collection journal article supplement (https://gsapubs.figshare.com/articles/dataset/_/25508593)
Supplement: Supplementary file 1 [file 1]

## Sheet: Hf-O
Table S3: Zircon Hf-O isotope compositions for the Silurian to Devonian granitoids in eastern and southern Newfoundland.
Sample Spot	t(Ma)	176Yb/177Hf	176Lu/177Hf	176Hf/177Hf	Hfi	εHf(t)	±1σ	TDM1(Ga)	T2DM(Ga)	δ18O	2SE
20NL23-1.01	427	0.0314426	0.00118621	0.282471	0.282462	-1.58285	0.358594	1.11038	1.52056	7.05328	0.215897
20NL23-1.02	427	0.0273599	0.00103691	0.282419	0.28241	-3.40748	0.35999	1.18008	1.63617	5.84497	0.273376
20NL23-1.03	427	0.0368744	0.00133984	0.282481	0.28247	-1.29842	0.377476	1.1018	1.50252	5.81794	0.299587
20NL23-1.04	427	0.0212499	0.000794493	0.282509	0.282502	-0.150533	0.369452	1.04675	1.42964
20NL23-1.05	427	0.022306	0.000839831	0.282484	0.282477	-1.04428	0.371704	1.08283	1.48639	6.2924	0.305715
20NL23-1.06	427	0.0274209	0.00100629	0.28251	0.282502	-0.161295	0.363122	1.05067	1.43032	6.99205	0.204127
20NL23-1.07	427	0.0351452	0.00125736	0.282487	0.282477	-1.03764	0.394362	1.08989	1.48597
20NL24-2.01	433	0.0282155	0.00106933	0.282446	0.282438	-2.30475	0.306656	1.14203	1.57101
20NL24-2.02	433	0.0247193	0.000924449	0.282461	0.282453	-1.75851	0.28666	1.11769	1.53638
20NL24-2.03	433	0.021352	0.000803691	0.282404	0.282398	-3.71958	0.312136	1.19283	1.6606	5.26393	0.7569
20NL24-2.04	433	0.0470393	0.00174321	0.282426	0.282412	-3.20794	0.29466	1.19149	1.62822	5.7319	0.309088
20NL24-2.05	433	0.0294833	0.00109299	0.28243	0.282421	-2.90138	0.310353	1.16619	1.60881	5.84844	0.245188
20NL24-2.06	433	0.0260514	0.000944707	0.282462	0.282455	-1.70954	0.352176	1.11612	1.53328	6.59319	0.116606
20NL24-2.07	433	0.0264692	0.000985346	0.282515	0.282507	0.144233	0.264668	1.0433	1.41558	5.81325	0.317651
20NL24-2.08	433	0.0284389	0.00106786	0.282414	0.282405	-3.46315	0.310419	1.188	1.64437	6.72257	0.213293
20NL24-2.09	433	0.0524976	0.00196054	0.282396	0.28238	-4.33076	0.284476	1.24161	1.69925	7.81664	0.347929
20NL24-2.10	477	0.0237159	0.0009001	0.282442	0.282434	-1.47757	0.29596	1.14356	1.55289
20NL24-2.11	433	0.0308393	0.00111577	0.28241	0.282401	-3.59502	0.315366	1.1942	1.65272
20NL24-2.12	433	0.0262983	0.000982341	0.282426	0.282418	-2.99514	0.336651	1.16775	1.61475
20NL24-2.13	466.5	0.0232484	0.000886128	0.282425	0.282417	-2.28281	0.340721	1.1662	1.59576
20NL24-2.14	1274	0.0201517	0.000817519	0.281697	0.281677	-10.5251	0.278404	2.17168	2.74478
20NL24-2.15	433	0.0165755	0.00062325	0.282463	0.282458	-1.57348	0.314853	1.105	1.52465
20NL24-2.16	433	0.0267481	0.00098757	0.282416	0.282408	-3.35096	0.296292	1.18194	1.63727	6.51873	0.353235
20NL24-2.17	433	0.0275913	0.00101714	0.282429	0.282421	-2.89257	0.342126	1.16436	1.60825	3.38416	1.03539
20NL24-2.18	433	0.0220011	0.000827667	0.282428	0.282421	-2.89355	0.312803	1.16074	1.60831	5.91812	0.381118
20NL24-2.19	433	0.0220919	0.000843164	0.282407	0.2824	-3.63896	0.333137	1.19045	1.6555
20NL24-2.20	433	0.0187341	0.000695808	0.282418	0.282412	-3.19943	0.310053	1.17023	1.62768
20NL42-1.01	538.8	0.0428879	0.00182572	0.282496	0.282477	1.43161	0.497507	1.09476	1.41619
20NL42-1.02	642	0.0387842	0.00149865	0.282347	0.282328	-1.54576	0.456866	1.29701	1.68586
20NL42-1.03	634	0.0183058	0.000729089	0.282354	0.282345	-1.13319	0.462368	1.2607	1.65344
20NL42-1.04	428	0.0680955	0.00251504	0.282517	0.282497	-0.327437	0.455054	1.08445	1.44165	6.11754	0.232672
20NL42-1.05	572	0.0392682	0.00148472	0.282357	0.282341	-2.65426	0.403588	1.28179	1.70158
20NL42-1.06	428	0.0244427	0.000928282	0.282466	0.282458	-1.69328	0.386954	1.11093	1.52834	5.97246	0.335396
20NL42-1.07	558	0.029766	0.00115502	0.282411	0.282399	-0.926902	0.459993	1.19502	1.58111
20NL42-1.08	662	0.0334433	0.00125563	0.282143	0.282127	-8.22348	0.403522	1.5747	2.12353
20NL42-1.09	477.1	0.03156	0.00112119	0.282624	0.282614	4.92163	0.422744	0.892473	1.14545
20NL42-1.10	428	0.0291338	0.00107138	0.282402	0.282393	-3.99748	0.395391	1.20503	1.67428	6.17755	0.205734
20NL42-1.11	428	0.0354481	0.00129105	0.282415	0.282405	-3.57185	0.368183	1.19261	1.64735
20NL42-1.12	569	0.0237112	0.000888959	0.282392	0.282383	-1.2468	0.410921	1.21252	1.60999
20NL42-1.13	428	0.0283815	0.00102448	0.282482	0.282474	-1.1414	0.381639	1.09076	1.49333	6.18415	0.192673
20NL42-1.14	428	0.0354227	0.00121265	0.282417	0.282407	-3.49768	0.452605	1.18805	1.64266	8.58904	0.21511
20NL42-1.15	428	0.0330145	0.00122687	0.282439	0.282429	-2.70659	0.390979	1.1568	1.59257	6.03891	0.255116
20NL42-1.16	428	0.0293767	0.00104392	0.282487	0.282479	-0.955159	0.364045	1.0837	1.48151	5.93166	0.210111
20NL42-1.17	428	0.0275833	0.00099651	0.282452	0.282444	-2.18637	0.339556	1.13172	1.55961	5.66697	0.373904
20NL42-2.01	435	0.0334896	0.00117649	0.282519	0.28251	0.287395	0.409586	1.0424	1.40805
20NL42-2.02	435	0.060365	0.00224749	0.282482	0.282464	-1.34094	0.596539	1.12714	1.51146
20NL42-2.03	435	0.0305357	0.00106178	0.282441	0.282433	-2.43832	0.391651	1.14889	1.58104	6.14788	0.250041
20NL42-2.04	484	0.0271453	0.00118492	0.282244	0.282233	-8.42912	0.341652	1.43075	1.99757
20NL42-2.05	435	0.00240402	6.49263e-05	0.282465	0.282465	-1.29884	0.302873	1.08634	1.50879	8.1712	0.232882
20NL42-2.06	562	0.0535946	0.00182341	0.282407	0.282387	-1.22931	0.461863	1.22222	1.60342
20NL42-2.07	435	0.0276894	0.000965066	0.282431	0.282423	-2.79008	0.355619	1.16099	1.60332	5.8402	0.301743
20NL42-2.08	484.1	0.0645323	0.00225345	0.282318	0.282298	-6.12957	0.35948	1.36471	1.85275
20NL42-2.09	980	0.0493363	0.0018037	0.28228	0.282246	3.072	0.486851	1.4033	1.65493
20NL42-2.10	382.9	0.039281	0.00136255	0.282622	0.282612	2.77558	0.330942	0.901178	1.20901
20NL42-2.11	435	0.0281851	0.00108879	0.282444	0.282435	-2.36192	0.349732	1.14637	1.5762	4.72584	0.239544
20NL42-2.12	435	0.0259202	0.000934246	0.282419	0.282411	-3.19406	0.318844	1.17638	1.6289	5.82299	0.342233
20NL42-2.13	435	0.0222144	0.0007579	0.282449	0.282443	-2.07435	0.307039	1.12883	1.55797	4.6686	0.248029
20NL42-2.14	1059	0.0172169	0.000629104	0.282171	0.282158	1.72073	0.314327	1.51046	1.80251
20NL42-2.15	435	0.0577908	0.00213698	0.282189	0.282172	-11.671	0.383387	1.54593	2.16289	6.5368	0.33223
20NL42-2.16	390.9	0.0497506	0.00184648	0.282504	0.282491	-1.35601	0.388021	1.08287	1.478
20NL42-2.17	435	0.0512604	0.00180252	0.282498	0.282483	-0.663486	0.341548	1.09131	1.46846	6.70247	0.232564
20NL42-2.18	578.2	0.0100136	0.000327384	0.282474	0.282471	2.0731	0.330272	1.08168	1.40603
20NL42-2.19	435	0.0176212	0.000643868	0.28244	0.282434	-2.37702	0.334503	1.13863	1.57715	5.43549	0.276219
20NL42-2.20	435	0.0249079	0.000893277	0.28243	0.282423	-2.78334	0.372548	1.15934	1.60289
20NL42-2.21	482.6	0.0364747	0.00130983	0.282518	0.282507	1.22789	0.334049	1.04739	1.38534
20NL42-2.22	435	0.0527018	0.00185503	0.282667	0.282651	5.30593	0.340879	0.849263	1.08807
20NL42-2.23	435	0.0209415	0.00081084	0.282438	0.282432	-2.46759	0.456621	1.14531	1.58289	5.57651	0.352241
20NL43-1.01	421.9	0.0239544	0.000843028	0.282436	0.28243	-2.82977	0.289744	1.14908	1.59561
20NL43-1.02	421.9	0.0369555	0.00122923	0.282443	0.282433	-2.72335	0.303338	1.15234	1.58887
20NL43-1.03	421.9	0.0370107	0.00125632	0.282435	0.282425	-2.98639	0.316699	1.16337	1.60553
20NL43-1.04	421.9	0.0351168	0.00122035	0.282437	0.282428	-2.90818	0.316739	1.15954	1.60058	7.7921	0.521767
20NL43-1.05	421.9	0.0208881	0.000737264	0.28245	0.282444	-2.33674	0.327868	1.12764	1.56438
20NL43-1.06	1100	0.0272389	0.000952156	0.282453	0.282433	12.3722	0.273765	1.12976	1.15089
20NL43-1.07	421.9	0.0302567	0.00105001	0.282469	0.282461	-1.73073	0.313172	1.10944	1.52596
20NL43-1.08	421.9	0.0254723	0.000918128	0.282412	0.282405	-3.72328	0.279848	1.18586	1.65217	7.12372	0.334701
20NL43-1.09	421.9	0.0303447	0.00109827	0.282424	0.282416	-3.32644	0.318973	1.17376	1.62706	6.45585	0.320582
20NL43-1.10	421.9	0.0243406	0.000851504	0.28238	0.282373	-4.82845	0.287407	1.22811	1.72204
20NL43-1.11	421.9	0.0222061	0.000786157	0.282421	0.282415	-3.35433	0.309734	1.16866	1.62882
20NL43-1.12	421.9	0.0457494	0.00153736	0.28241	0.282398	-3.94923	0.341755	1.20768	1.66646
20NL43-1.13	421.9	0.0324993	0.00112639	0.282394	0.282385	-4.42219	0.344275	1.21787	1.69637
20NL43-1.14	421.9	0.0306162	0.00105702	0.282423	0.282415	-3.34843	0.356727	1.17381	1.62845
20NL43-1.15	421.9	0.0263458	0.000927614	0.282425	0.282418	-3.25208	0.298401	1.16742	1.62235	7.7183	0.272468
20NL43-1.16	421.9	0.0314843	0.00110977	0.282435	0.282426	-2.95723	0.345673	1.15932	1.60368
20NL43-1.17	421.9	0.0364331	0.0012399	0.282424	0.282414	-3.39339	0.376106	1.17928	1.6313	7.53265	0.145162
20NL43-1.18	421.9	0.015052	0.000529985	0.282422	0.282418	-3.25484	0.29336	1.15975	1.62253
20NL43-1.19	421.9	0.0271316	0.000943208	0.282442	0.282435	-2.65949	0.371796	1.14427	1.58483
20NL43-1.20	421.9	0.0210274	0.000743561	0.282427	0.282421	-3.15292	0.339256	1.1599	1.61607
20NL43-1.21	421.9	0.0229787	0.000802589	0.282448	0.282442	-2.40649	0.32975	1.13161	1.5688
20NL43-1.22	421.9	0.024028	0.000848127	0.282396	0.282389	-4.26605	0.324774	1.20586	1.6865
20NL43-1.23	466.1	0.0501136	0.00165519	0.282478	0.282463	-0.671072	0.393338	1.11538	1.4932	7.87642	0.25223
20NL43-1.24	421.9	0.0168328	0.000598106	0.282401	0.282396	-4.01653	0.362627	1.19093	1.67072
20NL43-1.25	421.9	0.018982	0.000679985	0.282412	0.282407	-3.65404	0.316405	1.17835	1.64779
20NL43-1.26	421.9	0.025672	0.000910273	0.282401	0.282394	-4.08941	0.319636	1.20017	1.67533	7.50072	0.330034
20NL43-1.27	421.9	0.0215701	0.000782097	0.282388	0.282382	-4.53436	0.3578	1.21506	1.70346	7.73175	0.283408
20NL43-1.28	421.9	0.0258808	0.000955336	0.282411	0.282404	-3.75845	0.304458	1.18801	1.65439
20NL43-1.29	421.9	0.0206842	0.000781702	0.282438	0.282432	-2.76671	0.314527	1.14542	1.59162
20NL43-1.30	421.9	0.0249995	0.000893839	0.282472	0.282465	-1.58659	0.327487	1.10089	1.51682
20NL56-1.01	396.1	0.013795	0.000586	0.282524	0.28252	-0.22	0.32341	1.01989	1.39974
20NL56-1.02	429.8	0.017192	0.000657	0.282406	0.2824	-3.69	0.34736	1.18598	1.64417	8.02602	0.263192
20NL56-1.03	429.8	0.045675	0.001666	0.282418	0.2824	-3.56	0.34374	1.20131	1.63578	9.33328	0.225003
20NL56-1.04	429.8	0.028933	0.001183	0.282453	0.28244	-2.18	0.34529	1.13634	1.5487	8.2632	0.27507
20NL56-1.05	429.8	0.033546	0.001205	0.28243	0.28242	-2.99	0.46028	1.1693	1.6002
20NL56-1.06	477.7	0.02832	0.001142	0.282409	0.2824	-2.7	0.3669	1.19687	1.61785
20NL56-1.07	429.8	0.028562	0.001061	0.282496	0.28249	-0.6	0.40717	1.07148	1.44929	7.99972	0.290921
20NL56-1.08	429.8	0.047127	0.00172	0.282442	0.28243	-2.7	0.34679	1.16783	1.58174	8.27091	0.209225
20NL56-1.09	429.8	0.072892	0.002662	0.282383	0.28236	-5.08	0.33749	1.28584	1.73174	7.34651	0.290814
20NL56-1.10	429.8	0.036823	0.001344	0.282467	0.28246	-1.73	0.38841	1.12142	1.52033
20NL56-1.11	429.8	0.021832	0.000841	0.282428	0.28242	-2.97	0.30111	1.16146	1.59908
20NL56-1.12	481.7	0.010477	0.000392	0.282246	0.28224	-8.15	0.343	1.39846	1.96427
20NL56-2.01	557.7	0.0182686	0.000674549	0.282252	0.282245	-6.37966	0.275569	1.40036	1.92597
20NL56-2.02	429.9	0.0230851	0.000858565	0.282448	0.282441	-2.2441	0.32208	1.13305	1.56475	6.31389	0.23791
20NL56-2.03	429.9	0.0264465	0.000968753	0.282471	0.282463	-1.47332	0.331563	1.10456	1.51588	7.85945	0.226796
20NL56-2.04	429.9	0.0212135	0.00078217	0.282488	0.282481	-0.825664	0.360782	1.07567	1.47478
20NL56-2.05	429.9	0.0219486	0.000823504	0.282443	0.282437	-2.41281	0.307522	1.13905	1.57544	7.80009	0.175296
20NL56-2.06	429.9	0.0196793	0.000745358	0.282467	0.282461	-1.53486	0.338378	1.103	1.51978	7.80892	0.281887
20NL56-2.07	429.9	0.035823	0.00126908	0.28244	0.28243	-2.65767	0.379369	1.15728	1.59095	7.10219	0.172686
20NL56-2.08	429.9	0.0163806	0.000634217	0.282457	0.282452	-1.87474	0.28052	1.11439	1.54133	7.28522	0.152824
20NL56-2.09	429.9	0.0404311	0.00141962	0.282406	0.282395	-3.895	0.40104	1.2098	1.66928	7.6435	0.278067
20NL56-2.10	429.9	0.0319402	0.00120238	0.282435	0.282426	-2.79914	0.325454	1.16163	1.59991
20NL56-2.11	429.9	0.0183309	0.000709476	0.282504	0.282498	-0.237731	0.392374	1.05127	1.43744
20NL56-2.12	429.9	0.0247427	0.000918477	0.282461	0.282454	-1.80846	0.327177	1.11692	1.53713	7.95662	0.249612
20NL56-2.13	429.9	0.0310714	0.00110801	0.282476	0.282467	-1.34276	0.343838	1.10186	1.50759
20NL56-2.14	429.9	0.020087	0.000716825	0.282467	0.282461	-1.5505	0.314723	1.10311	1.52077
20NL56-2.15	429.9	0.0224899	0.00083932	0.282445	0.282438	-2.36383	0.353601	1.13742	1.57234	7.81174	0.226698
20NL56-2.16	429.9	0.0225677	0.000835275	0.282464	0.282458	-1.67231	0.328603	1.11003	1.5285	8.07721	0.276955
20NL56-2.17	429.9	0.0166641	0.000605447	0.28248	0.282475	-1.04888	0.321459	1.08144	1.48894
20NL56-2.18	429.9	0.026409	0.000947136	0.282422	0.282414	-3.20653	0.327965	1.17279	1.62571
20NL56-2.19	623.2	0.0359809	0.00124437	0.282322	0.282308	-2.69294	0.369207	1.32221	1.74395
20NL56-2.20	429.9	0.0268493	0.000956386	0.282451	0.282443	-2.16839	0.371038	1.13187	1.55995
20NL56-2.21	429.9	0.0291364	0.00103773	0.282394	0.282386	-4.20121	0.347058	1.21402	1.68864
20NL56-2.22	429.9	0.0286077	0.00104163	0.282464	0.282456	-1.73158	0.312018	1.11612	1.53226
20NL56-2.23	429.9	0.0181026	0.000653317	0.282468	0.282463	-1.49383	0.296681	1.09976	1.51718	7.33316	0.176995
20NL56-2.24	429.9	0.0269646	0.000987622	0.28247	0.282462	-1.49813	0.316623	1.10588	1.51745
20NL56-2.25	429.9	0.0212532	0.00075201	0.282446	0.28244	-2.30821	0.315179	1.13359	1.56881
20NL56-2.26	429.9	0.0343657	0.00121165	0.282423	0.282414	-3.22746	0.319254	1.17888	1.62704
20NL56-2.27	429.9	0.020224	0.0007324	0.282468	0.282462	-1.50369	0.30901	1.10154	1.5178	7.8913	0.238441
20NL56-2.28	429.9	0.0268711	0.000966016	0.282464	0.282456	-1.72849	0.311549	1.11462	1.53206
20NL58-1.01	432.8	0.0277402	0.00102844	0.282411	0.282403	-3.5485	0.319279	1.19042	1.64962
20NL58-1.02	432.8	0.0451579	0.00158546	0.282364	0.282351	-5.36806	0.333811	1.27496	1.76464
20NL58-1.03	506.8	0.0322214	0.0012097	0.282421	0.28241	-1.66504	0.309745	1.18185	1.58803
20NL58-1.04	463.2	0.0339527	0.00129093	0.282134	0.282123	-12.7857	0.319023	1.58878	2.25476
20NL58-1.05	461.1	0.0249869	0.000940883	0.282425	0.282417	-2.41207	0.337694	1.16774	1.59974
20NL58-1.06	432.8	0.0303259	0.00105527	0.282488	0.28248	-0.817209	0.342441	1.0825	1.4765
20NL58-1.07	432.8	0.0265391	0.000930492	0.28243	0.282422	-2.85594	0.308491	1.16106	1.60578	7.36402	0.217171
20NL58-1.08	432.8	0.0313032	0.00115327	0.282386	0.282376	-4.48671	0.336934	1.23024	1.70896	7.18272	0.238191
20NL58-1.09	432.8	0.0274128	0.000988237	0.282414	0.282406	-3.41918	0.365975	1.18449	1.64144	7.50912	0.223584
20NL58-1.10	432.8	0.0213536	0.000755768	0.282411	0.282405	-3.47599	0.333511	1.18212	1.64503
20NL58-1.11	432.8	0.0252257	0.000874915	0.28242	0.282413	-3.18172	0.35457	1.17286	1.6264	6.85193	0.257145
20NL58-1.12	432.8	0.0234813	0.000806421	0.282408	0.282401	-3.6044	0.334395	1.18818	1.65316	7.70106	0.232253
20NL58-1.13	432.8	0.0285897	0.000969561	0.282439	0.282431	-2.53861	0.359874	1.14925	1.58567
20NL58-1.14	432.8	0.0225649	0.000813481	0.282428	0.282422	-2.87275	0.321105	1.15947	1.60684	7.66196	0.32093
20NL58-1.15	432.8	0.0190425	0.000675281	0.282446	0.282441	-2.19547	0.359044	1.13021	1.56393	8.07855	0.203698
20NL58-1.16	432.8	0.0340658	0.00117294	0.28241	0.2824	-3.63007	0.378226	1.19659	1.65478	7.20935	0.142595
20NL58-1.17	432.8	0.0310324	0.00104438	0.28243	0.282422	-2.8637	0.350705	1.16358	1.60627	7.59531	0.234378
20NL58-1.18	432.8	0.0255721	0.00087976	0.282409	0.282402	-3.58738	0.35553	1.18897	1.65208
20NL58-1.19	432.8	0.0232522	0.000816269	0.282407	0.282401	-3.61961	0.377795	1.18898	1.65412	7.89342	0.15491
20NL58-1.20	432.8	0.0243427	0.000870603	0.282412	0.282405	-3.4689	0.346816	1.18411	1.64458
20NL58-1.21	432.8	0.0276958	0.000950242	0.282398	0.282391	-3.97413	0.360336	1.20568	1.67655
20NL58-1.22	432.8	0.0197553	0.000699683	0.282433	0.282427	-2.67267	0.365752	1.14943	1.59417
20NL58-1.23	432.8	0.0288867	0.00099388	0.282422	0.282414	-3.156	0.339732	1.17418	1.62478
20NL58-1.24	432.8	0.0245788	0.000891084	0.282437	0.28243	-2.58701	0.328045	1.14967	1.58874
20NL59-1.01	426.4	0.0290102	0.00105771	0.282411	0.282403	-3.68184	0.394843	1.19087	1.65306	7.86024	0.176045
20NL59-1.02	426.4	0.0302156	0.00110013	0.28243	0.282421	-3.04982	0.423284	1.16662	1.61306
20NL59-1.03	426.4	0.0511036	0.00175909	0.282408	0.282394	-3.98369	0.379949	1.2176	1.67216
20NL59-1.04	426.4	0.0406998	0.00141904	0.282393	0.282381	-4.44638	0.388817	1.2289	1.70141	7.99793	0.312255
20NL59-1.05	426.4	0.0333335	0.00116857	0.282417	0.282407	-3.52376	0.442938	1.18684	1.64306	7.7567	0.164047
20NL59-1.06	426.4	0.0241824	0.000868133	0.282428	0.282421	-3.04296	0.398522	1.16181	1.61262	8.57227	0.1848
20NL59-1.07	426.4	0.0383435	0.0013561	0.282434	0.282423	-2.97427	0.414464	1.16868	1.60827	8.26029	0.261517
20NL59-1.08	426.4	0.0308078	0.00109418	0.282423	0.282414	-3.2819	0.400107	1.17573	1.62775	7.80814	0.342206
20NL59-1.09	426.4	0.0337292	0.00118903	0.282411	0.282401	-3.7427	0.353149	1.19597	1.65691
20NL59-1.10	426.4	0.0189352	0.000678917	0.2824	0.282395	-3.97157	0.335114	1.19463	1.67139	8.02948	0.285777
20NL59-1.11	426.4	0.0303231	0.00109137	0.282391	0.282383	-4.40216	0.353721	1.22015	1.69862
20NL59-1.12	426.4	0.0315651	0.00109795	0.282422	0.282413	-3.31078	0.328497	1.17695	1.62958
20NL59-1.13	426.4	0.029894	0.00108504	0.282432	0.282423	-2.9557	0.312513	1.16259	1.6071
20NL59-1.14	426.4	0.0289277	0.00101378	0.282427	0.282419	-3.12241	0.375828	1.1678	1.61765	8.44576	0.234928
20NL59-1.15	426.4	0.0370744	0.00130295	0.282421	0.28241	-3.41569	0.333856	1.18526	1.63622
20NL59-1.16	426.4	0.0293642	0.00102067	0.282466	0.282458	-1.73541	0.339948	1.11292	1.52977
20NL59-1.17	426.4	0.0282324	0.00101304	0.282455	0.282447	-2.13353	0.298259	1.12857	1.55501
20NL59-1.18	426.4	0.0187372	0.000665053	0.282414	0.282409	-3.47133	0.302569	1.1747	1.63974
20NL59-1.19	1145	0.0177236	0.000614651	0.282033	0.28202	-1.26674	0.364936	1.69982	2.05944
20NL59-1.20	426.4	0.0327079	0.00113159	0.282415	0.282406	-3.55651	0.340008	1.18739	1.64513	7.74015	0.206789
20NL59-1.21	426.4	0.0408812	0.00139294	0.282443	0.282432	-2.64844	0.366922	1.15636	1.58764	8.16066	0.238056
20NL22-1.1	409.6	0.0723524	0.00269491	0.282576	0.282555	1.33236	0.335391	1.00314	1.32177	5.77406	0.636474
20NL22-1.2	409.6	0.0448455	0.00173197	0.282631	0.282617	3.53923	0.380677	0.898058	1.18113	6.35388	0.284063
20NL22-1.3	409.6	0.0549122	0.00212658	0.282605	0.282588	2.50824	0.33443	0.945667	1.24687	5.44606	0.191741
20NL22-1.4	409.6	0.0310373	0.00116138	0.282617	0.282608	3.21105	0.339118	0.903736	1.20206
20NL22-1.5	409.6	0.035424	0.00134141	0.282515	0.282504	-0.46375	0.347108	1.05362	1.43596	7.68909	0.248627
20NL22-1.6	409.6	0.0337906	0.00131519	0.28252	0.28251	-0.267762	0.339198	1.04532	1.42351
20NL22-1.7	409.6	0.0288945	0.001107	0.282552	0.282543	0.91081	0.324393	0.994815	1.34859	6.2084	0.231313
20NL22-1.8	409.6	0.0505093	0.00193646	0.282508	0.282493	-0.851636	0.324793	1.07986	1.46059	5.7454	0.417723
20NL22-1.9	409.6	0.0495682	0.00190057	0.282524	0.28251	-0.277465	0.30967	1.05585	1.42412
20NL22-1.10	409.6	0.0385214	0.00148399	0.282536	0.282525	0.253352	0.335647	1.02723	1.39039	5.40889	0.253488
20NL22-1.11	409.6	0.0522996	0.00197859	0.282505	0.28249	-0.975037	0.503852	1.08566	1.46842	5.49068	0.321145
20NL22-1.12	409.6	0.036096	0.0014073	0.282538	0.282527	0.343516	0.371517	1.02234	1.38466
20NL22-1.13	409.6	0.0452933	0.00173256	0.282522	0.282509	-0.307998	0.546786	1.05414	1.42606	6.33033	0.294676
20NL22-1.14	409.6	0.0435152	0.00164332	0.282528	0.282516	-0.0555015	0.3444	1.04238	1.41002	6.32518	0.205905
20NL22-1.15	409.6	0.0393649	0.00149431	0.282563	0.282551	1.1938	0.399449	0.98952	1.33058	5.62041	0.394423
20NL22-1.16	409.6	0.0318475	0.00119916	0.282534	0.282525	0.276062	0.453711	1.02162	1.38895	5.23318	0.229126
20NL22-1.17	575.7	0.0209449	0.00080567	0.282386	0.282378	-1.26877	0.460859	1.21767	1.61661
20NL22-1.18	409.6	0.0317161	0.00123714	0.282519	0.28251	-0.279108	0.421103	1.04444	1.42423
20NL22-1.19	409.6	0.0421792	0.00160679	0.282523	0.282511	-0.227346	0.372016	1.04869	1.42094
20NL22-1.20	409.6	0.0358201	0.00136556	0.282544	0.282534	0.577364	0.365336	1.01226	1.3698
20NL22-1.21	409.6	0.0428	0.00168696	0.282537	0.282524	0.239413	0.457362	1.03119	1.39128
20NL22-1.22	409.6	0.0272535	0.00106263	0.282515	0.282507	-0.38119	0.292548	1.04555	1.43071
20NL22-1.23	409.6	0.0285691	0.00110601	0.282565	0.282557	1.38513	0.303741	0.975884	1.31841
20NL43-3.01	470	0.0342604	0.00140473	0.28236	0.282348	-4.66808	0.597906	1.27436	1.74946
20NL43-3.02	470	0.0409629	0.00156993	0.28262	0.282606	4.46791	0.416402	0.909809	1.16891
20NL43-3.03	470	0.0204802	0.000818363	0.28228	0.282273	-7.30714	0.887194	1.36569	1.91599
20NL43-3.04	470	0.0214597	0.000835137	0.282485	0.282478	-0.0755687	0.901023	1.08108	1.45841
20NL43-3.05	409.2	0.0202843	0.00072193	0.282608	0.282602	2.98894	0.356149	0.906437	1.21592	5.79729	0.20605
20NL43-3.06	409.2	0.027813	0.000993067	0.282616	0.282608	3.21467	0.417763	0.901037	1.20152	5.70668	0.15556
20NL43-3.07	409.2	0.0472517	0.00168316	0.282703	0.28269	6.10884	2.29441	0.792713	1.01659
20NL43-3.08	409.2	0.0343317	0.00119688	0.282626	0.282616	3.49593	0.557617	0.892457	1.18358
20NL43-3.09	409.2	0.0281759	0.000971515	0.282621	0.282614	3.40571	0.337463	0.893151	1.18933	5.70997	0.23959
20NL43-3.10	409.2	0.0300227	0.00103539	0.282429	0.282421	-3.41979	0.354795	1.16543	1.62305	8.02789	0.32463
20NL43-3.11	409.2	0.0194243	0.000743779	0.282622	0.282616	3.48916	0.562337	0.886935	1.18401
20NL43-3.12	470	0.072388	0.002609	0.282536	0.282513	1.18521	0.359021	1.0589	1.37824
20NL43-3.13	409.2	0.0325338	0.00113037	0.282601	0.282592	2.62696	0.391691	0.926324	1.239	6.29459	0.12084
20NL43-3.14	409.2	0.0304539	0.00106981	0.282602	0.282594	2.7089	0.385567	0.922221	1.23377	6.09478	0.5889
20NL43-3.15	409.2	0.0354236	0.00119417	0.282596	0.282587	2.45029	0.409207	0.934276	1.25026	5.65421	0.21713
20NL43-3.16	470	0.0768137	0.00258289	0.282703	0.28268	7.10746	0.359536	0.812365	1.00001
20NL43-3.17	409.2	0.0261472	0.000960231	0.28261	0.282603	3.00462	0.574002	0.908964	1.21492	4.95103	0.4924
20NL43-3.18	409.2	0.0345899	0.00128703	0.282617	0.282607	3.1622	0.878714	0.90702	1.20487
20NL43-3.19	409.2	0.0292822	0.00100444	0.282588	0.28258	2.20728	0.381655	0.941299	1.26574	6.12148	0.18656
20NL43-3.20	470	0.0921536	0.00331425	0.282534	0.282505	0.897898	0.407173	1.08283	1.39652
20NL05-1.01	384	0.0198869	0.000730524	0.282507	0.282501	-1.13333	0.298114	1.04784	1.45849
20NL05-1.02	384	0.0304466	0.00116783	0.282497	0.282489	-1.57907	0.352721	1.07337	1.48676
20NL05-1.03	384	0.0526491	0.00190166	0.282483	0.282469	-2.26561	0.278403	1.11506	1.53029	10.1053	0.180942
20NL05-1.04	384	0.0573465	0.00214463	0.282471	0.282456	-2.73825	0.318327	1.13926	1.56023	9.51835	0.355398
20NL05-1.05	384	0.0304718	0.0011449	0.282483	0.282475	-2.06421	0.296917	1.09228	1.51752
20NL05-1.06	384	0.0329727	0.00122481	0.282494	0.282486	-1.69399	0.303749	1.07901	1.49405	8.61251	0.22841
20NL05-1.07	384	0.0840489	0.00333624	0.282395	0.282371	-5.75597	0.375752	1.29217	1.75102
20NL05-1.08	384	0.0351308	0.0013611	0.282466	0.282456	-2.72537	0.313328	1.12288	1.55942	9.36696	0.201507
20NL05-1.09	384	0.0298571	0.00113746	0.28249	0.282482	-1.82808	0.329714	1.08274	1.50255
20NL05-1.10	384	0.05519	0.00215227	0.282461	0.282446	-3.09743	0.332012	1.15411	1.58298
20NL05-1.11	384	0.022868	0.000826181	0.28252	0.282514	-0.6744	0.349199	1.03138	1.42936
20NL05-1.12	384	0.074496	0.00292379	0.282461	0.28244	-3.31054	0.329755	1.17964	1.59647	8.6614	0.183713
20NL05-1.13	384	0.0187698	0.000669116	0.2825	0.282495	-1.34344	0.327906	1.05504	1.47182	9.45839	0.219634
20NL05-1.14	384	0.0558901	0.00207549	0.28246	0.282445	-3.12847	0.293814	1.15377	1.58494	10.497	0.182858
20NL05-1.15	384	0.0479611	0.00178231	0.282496	0.282483	-1.77027	0.319774	1.09262	1.49889
20NL05-1.16	384	0.0273658	0.000982333	0.282491	0.282484	-1.73619	0.324037	1.07621	1.49673	10.0888	0.255847
20NL05-1.17	384	0.0379171	0.00135484	0.282458	0.282448	-3.00641	0.321534	1.13401	1.57721
20NL05-1.18	384	0.0413816	0.00150768	0.282493	0.282482	-1.82573	0.344951	1.08961	1.5024
20NL05-1.19	384	0.0740378	0.00287775	0.282453	0.282432	-3.57788	0.301869	1.18977	1.61338	10.0819	0.170855
20NL05-1.20	384	0.0377985	0.0013961	0.282499	0.282489	-1.56034	0.322846	1.07685	1.48558	9.53468	0.253071
20NL05-1.21	384	0.0180388	0.000647983	0.282511	0.282506	-0.96505	0.300254	1.03978	1.44781	7.79583	0.529769
20NL47-1.01	380.3	0.021574	0.000825795	0.282684	0.282678	5.03176	0.329137	0.80205	1.06296
20NL47-1.02	380.3	0.0263205	0.00099692	0.282688	0.282681	5.15274	0.29835	0.799145	1.05522
20NL47-1.03	380.3	0.0412151	0.00152615	0.282723	0.282712	6.24181	0.487293	0.761037	0.985551	3.93813	0.171628
20NL47-1.04	380.3	0.0196843	0.000743047	0.282677	0.282672	4.81389	0.483893	0.809761	1.07688
20NL47-1.05	380.3	0.0944943	0.00341736	0.282707	0.282682	5.18722	0.337179	0.826533	1.05302	4.48165	0.395902
20NL47-1.06	380.3	0.0441346	0.00162631	0.282673	0.282661	4.43442	0.515216	0.835427	1.10112	3.96368	0.274887
20NL47-1.07	380.3	0.0414868	0.00158275	0.282702	0.282691	5.49158	0.398273	0.792047	1.03356
20NL47-1.08	380.3	0.0761883	0.0026406	0.282688	0.282669	4.72236	0.336876	0.836272	1.08273	5.05811	0.255124
20NL47-1.09	380.3	0.0280097	0.000995573	0.282668	0.282661	4.43991	0.319322	0.827566	1.10077
20NL47-1.10	380.3	0.0233019	0.000902132	0.282704	0.282697	5.72336	0.857323	0.775372	1.01873	3.65368	0.13438
20NL47-1.11	380.3	0.0229141	0.000866333	0.282667	0.282661	4.43867	0.348862	0.826081	1.10085
20NL47-1.12	380.3	0.0286977	0.00106537	0.282698	0.282691	5.48743	0.401292	0.786528	1.03382	4.93936	0.243318
20NL47-1.13	380.3	0.0157155	0.000580941	0.282692	0.282688	5.37605	0.39709	0.785741	1.04094
20NL47-1.14	380.3	0.0249411	0.00093329	0.282669	0.282662	4.47181	0.336488	0.825555	1.09874	4.38915	0.249656
20NL47-1.15	380.3	0.0427602	0.00146934	0.282701	0.282691	5.48379	0.362934	0.791102	1.03405
20NL47-1.16	380.3	0.0230494	0.00080626	0.282689	0.282684	5.23662	0.366468	0.793698	1.04986	4.12797	0.234822
20NL47-1.17	380.3	0.0752834	0.00255878	0.282722	0.282703	5.93705	0.407123	0.784663	1.00506
20NL47-1.18	380.3	0.0505473	0.0018309	0.282704	0.282691	5.50558	0.386433	0.794258	1.03266
20NL47-1.19	380.3	0.0223975	0.000822712	0.282664	0.282658	4.3261	0.335631	0.830034	1.10804
20NL47-1.20	380.3	0.038124	0.00134969	0.282676	0.282666	4.62288	0.367404	0.824455	1.08909	4.44684	0.258927
20NL55-1.01	426.9	0.0236497	0.000894051	0.282568	0.282561	1.9258	0.351627	0.966006	1.29748
20NL55-1.02	386	0.0197045	0.000770991	0.282553	0.282548	0.557061	0.326072	0.983481	1.35267	7.62343	0.297473
20NL55-1.03	386	0.0315598	0.00114459	0.282507	0.282499	-1.18017	0.412117	1.05874	1.46302	7.8638	0.283639
20NL55-1.04	386	0.0312116	0.00120039	0.282541	0.282533	0.024163	0.36275	1.01164	1.38655	6.99287	0.243334
20NL55-1.05	386	0.0262375	0.000968109	0.282566	0.28256	0.968612	0.397098	0.970255	1.3265
20NL55-1.06	386	0.0317123	0.00117008	0.282507	0.282498	-1.19233	0.388625	1.05969	1.46379	6.36918	0.60534
20NL55-1.07	386	0.0271403	0.00102321	0.282524	0.282516	-0.555516	0.356489	1.03174	1.42337
20NL55-1.08	386	0.0239201	0.000876411	0.282585	0.282578	1.63358	0.412508	0.942463	1.28418	7.28232	0.221889
20NL55-1.09	386	0.0206897	0.000785833	0.282554	0.282548	0.563829	0.36394	0.983448	1.35224	8.26262	0.160294
20NL55-1.10	386	0.0267031	0.000965298	0.282492	0.282485	-1.66391	0.387486	1.07473	1.49371
20NL55-1.11	386	0.0275053	0.00103344	0.282533	0.282525	-0.241646	0.452659	1.01943	1.40343	7.19812	0.27433
20NL55-1.12	386	0.0261682	0.000973246	0.282554	0.282547	0.525145	0.390968	0.98796	1.3547	7.63806	0.161824
20NL55-1.13	386	0.0206622	0.000768791	0.282555	0.282549	0.606494	0.42656	0.981492	1.34953
20NL55-1.14	386	0.017997	0.0006727	0.28256	0.282555	0.820406	0.468705	0.971549	1.33593
20NL55-1.15	386	0.0222493	0.000819542	0.282568	0.282562	1.05755	0.445197	0.964436	1.32084	6.84852	0.199511
20NL55-1.16	386	0.0426002	0.00152352	0.282557	0.282546	0.503221	0.363807	0.997775	1.3561
20NL55-1.17	386	0.0281499	0.00101845	0.282567	0.28256	0.977434	0.396302	0.970686	1.32594
20NL55-1.18	386	0.0213314	0.000774967	0.282505	0.282499	-1.15611	0.349187	1.05123	1.46149
20NL55-1.19	386	0.0339052	0.00122565	0.282526	0.282517	-0.54458	0.356675	1.0348	1.42267
20NL55-1.20	386	0.0324077	0.00112126	0.28256	0.282552	0.714769	0.41973	0.982771	1.34265
20NL55-1.21	386	0.0220489	0.000810525	0.282527	0.282521	-0.394412	0.369015	1.02174	1.41314
20NL57-1.01	383.8	0.0402015	0.00155129	0.282597	0.282586	1.86058	0.376064	0.941561	1.26801
20NL57-1.02	383.8	0.0403265	0.00152443	0.282603	0.282592	2.06911	0.345449	0.932739	1.25473	4.80251	0.256357
20NL57-1.03	383.8	0.0413081	0.00159995	0.282587	0.282575	1.47985	0.351115	0.957693	1.29225	4.83391	0.229267
20NL57-1.04	383.8	0.0425525	0.00162206	0.28261	0.282599	2.31121	0.362565	0.924388	1.23931
20NL57-1.05	383.8	0.0243365	0.00105541	0.282621	0.282614	2.83214	0.394035	0.895447	1.20611	5.40841	0.260725
20NL57-1.06	383.8	0.0413987	0.001754	0.282557	0.282544	0.37973	0.445071	1.00475	1.36223	5.8632	0.203581
20NL57-1.07	383.8	0.0644326	0.00272407	0.282597	0.282577	1.55284	0.380902	0.972633	1.28761
20NL57-1.08	383.8	0.0456907	0.00172242	0.282591	0.282579	1.5985	0.513524	0.954785	1.2847	4.48865	0.189504
20NL57-1.09	383.8	0.0513157	0.00189433	0.282615	0.282601	2.39556	0.422548	0.924958	1.23393	5.59635	0.178982
20NL57-1.10	383.8	0.0509249	0.00217409	0.282595	0.28258	1.63346	0.392365	0.96043	1.28247	5.00532	0.197246
20NL57-1.11	383.8	0.0288561	0.00108697	0.282587	0.282579	1.61918	0.412153	0.944287	1.28338
20NL57-1.12	383.8	0.0567185	0.00202057	0.282565	0.28255	0.600521	0.486583	1.00025	1.34819
20NL57-1.13	383.8	0.0381013	0.0014463	0.282612	0.282602	2.41512	0.404023	0.917642	1.23269	5.45686	0.362852
20NL57-1.14	383.8	0.0347916	0.00138775	0.282616	0.282606	2.55987	0.376104	0.910977	1.22346
20NL57-1.15	383.8	0.0498391	0.00181445	0.282581	0.282568	1.23633	0.44268	0.970943	1.30775
20NL57-1.16	383.8	0.0186959	0.000810643	0.282574	0.282568	1.23757	0.327137	0.955298	1.30767	5.65909	0.252717
20NL57-1.17	383.8	0.0463555	0.00170382	0.282587	0.282574	1.44385	0.378806	0.960769	1.29454	5.18831	0.119433
20NL57-1.18	383.8	0.036424	0.00134996	0.282564	0.282555	0.749572	0.325739	0.983167	1.33872
20NL61-1.01	386.4	0.0213426	0.000799049	0.282642	0.282637	3.70424	0.332169	0.859629	1.1525
20NL61-1.02	386.4	0.0357456	0.00128405	0.282657	0.282648	4.09735	0.369582	0.849995	1.12741
20NL61-1.03	386.4	0.0250773	0.000927173	0.282642	0.282635	3.6619	0.347248	0.862924	1.15521
20NL61-1.04	386.4	0.0375993	0.00136715	0.28265	0.28264	3.81702	0.354192	0.862316	1.1453	3.92232	0.27151
20NL61-1.05	386.4	0.0350755	0.00128264	0.282632	0.282623	3.21536	0.341059	0.885397	1.1837	4.49445	0.307086
20NL61-1.06	386.4	0.0417445	0.00151185	0.282609	0.282598	2.35064	0.363839	0.9234	1.23882
20NL61-1.07	386.4	0.0163634	0.000583941	0.282633	0.282629	3.42106	0.34259	0.868112	1.17057	3.94202	0.226699
20NL61-1.08	386.4	0.0311684	0.00113715	0.282634	0.282626	3.33045	0.333102	0.878855	1.17635
20NL61-1.09	386.4	0.0494647	0.00180407	0.282643	0.28263	3.46808	0.369768	0.882184	1.16757	3.56084	0.246431
20NL61-1.10	386.4	0.0269538	0.00094754	0.282633	0.282626	3.32953	0.416758	0.87641	1.17641	3.26241	0.215304
20NL61-1.11	386.4	0.0349946	0.0012349	0.282619	0.28261	2.7509	0.35171	0.903378	1.21331	3.43859	0.291197
20NL61-1.12	386.4	0.054144	0.0018662	0.282647	0.282633	3.58549	0.442627	0.878234	1.16008
20NL61-1.13	386.4	0.0370338	0.00135008	0.28262	0.282611	2.78288	0.654014	0.903692	1.21127	3.8672	0.356062
20NL61-1.14	386.4	0.0354867	0.00128178	0.282635	0.282626	3.32274	0.414769	0.881075	1.17685
20NL61-1.15	386.4	0.0732778	0.00225088	0.282588	0.282571	1.39233	0.402131	0.973775	1.29985
20NL61-1.16	386.4	0.0377065	0.00127998	0.282636	0.282626	3.34157	0.378757	0.880295	1.17564
20NL61-1.17	386.4	0.0361507	0.00124333	0.282651	0.282642	3.89958	0.388394	0.857425	1.14003
20NL61-1.18	386.4	0.0284771	0.00101498	0.282656	0.282649	4.14857	0.36462	0.84463	1.12414
20NL61-1.19	386.4	0.0310351	0.00103737	0.282636	0.282629	3.43608	0.366603	0.873333	1.16961	3.59138	0.273019
20NL61-1.20	386.4	0.0455113	0.00160693	0.282627	0.282615	2.93875	0.35893	0.900975	1.20134
20NL61-1.21	386.4	0.025493	0.000932973	0.282627	0.28262	3.12282	0.331195	0.884442	1.1896
20NL61-1.22	386.4	0.0430337	0.00136095	0.282628	0.282618	3.0572	0.331345	0.89281	1.19378
20NL61-1.23	386.4	0.0246521	0.00084272	0.282659	0.282653	4.29105	0.516181	0.836879	1.11504	3.95886	0.256283
20NL61-1.24	386.4	0.0352349	0.00120895	0.282621	0.282612	2.84181	0.331275	0.899378	1.20752
20NL61-1.25	386.4	0.0316311	0.00110483	0.282629	0.282621	3.13779	0.359872	0.886128	1.18864
20NL61-1.26	386.4	0.0355861	0.0012054	0.282633	0.282625	3.28653	0.33125	0.881514	1.17916
20NL61-1.27	386.4	0.0390468	0.00126318	0.282636	0.282627	3.3743	0.469938	0.878759	1.17356	3.78318	0.535023
20NL61-1.28	386.4	0.0301721	0.00100915	0.282643	0.282636	3.67758	0.329479	0.863339	1.15421
20NL61-1.29	386.4	0.0278583	0.000934613	0.282633	0.282627	3.35476	0.315456	0.875238	1.1748
20NL62-1.02	378.4	0.0933874	0.0031937	0.282724	0.282701	5.81658	0.514233	0.795427	1.01128
20NL62-1.03	378.4	0.0500476	0.00166545	0.282733	0.282721	6.52142	0.387838	0.749485	0.966168
20NL62-1.04	378.4	0.0692367	0.00224423	0.282713	0.282697	5.66464	0.581992	0.79079	1.021
20NL62-1.05	378.4	0.0561537	0.00190022	0.282713	0.2827	5.77016	0.417202	0.782603	1.01425	3.982	0.270897
20NL62-1.06	378.4	0.0966809	0.0030744	0.282713	0.282691	5.4677	0.621316	0.808764	1.0336
20NL62-1.07	378.4	0.0594272	0.00198249	0.282733	0.282719	6.44454	0.416633	0.755858	0.971091	4.45685	0.189087
20NL62-1.08	378.4	0.0527346	0.00174115	0.282725	0.282713	6.23382	0.376083	0.761968	0.984582	4.04847	0.508465
20NL62-1.09	378.4	0.0617681	0.00201004	0.282709	0.282695	5.59004	0.357281	0.791207	1.02578	4.40248	0.253467
20NL62-1.10	378.4	0.0528783	0.0016977	0.282724	0.282712	6.18283	0.409147	0.76359	0.987845	3.72484	0.398956
20NL62-1.11	378.4	0.0561168	0.00179405	0.282741	0.282728	6.76588	0.388934	0.740807	0.950512	3.89049	0.234954
20NL62-1.12	378.4	0.0330659	0.00108375	0.282764	0.282756	7.77296	0.456311	0.693587	0.885965	4.06186	0.378708
20NL62-1.13	378.4	0.0410248	0.00129471	0.28274	0.28273	6.84894	0.389582	0.732601	0.945191	2.68084	0.184006
20NL62-1.14	378.4	0.0572013	0.00183079	0.282719	0.282706	5.97099	0.381866	0.773638	1.0014
20NL62-1.15	378.4	0.0401025	0.00134932	0.282727	0.282717	6.39186	0.42645	0.751554	0.974463	3.36287	0.265149
20NL62-1.16	378.4	0.0556955	0.00178575	0.282735	0.282723	6.57563	0.39604	0.748488	0.962696	4.10142	0.230802
20NL62-1.17	378.4	0.0660455	0.00218015	0.282737	0.282721	6.53001	0.498436	0.754386	0.965618
20NL62-1.18	378.4	0.0575643	0.00176981	0.282726	0.282714	6.25375	0.382216	0.761454	0.983305
20NL62-1.19	378.4	0.0459706	0.00144206	0.282732	0.282722	6.55234	0.422713	0.746	0.964188
20NL62-1.20	378.4	0.0664529	0.00202334	0.282747	0.282732	6.92164	0.476682	0.736686	0.940534
20NL62-1.21	378.4	0.0626775	0.00192285	0.282735	0.282721	6.52633	0.472846	0.751894	0.965854
20NL62-1.22	378.4	0.074554	0.00242508	0.282728	0.282711	6.15357	0.440485	0.772564	0.989718
20NL62-1.23	378.4	0.0333876	0.00107864	0.282752	0.282744	7.32789	0.36585	0.711375	0.9145
20NL62-1.24	378.4	0.063601	0.00198082	0.282712	0.282698	5.71045	0.399425	0.785941	1.01807
20NL66-1.01	377.7	0.0331524	0.00124141	0.282618	0.28261	2.55801	0.373849	0.903789	1.21882
20NL66-1.02	377.7	0.03384	0.00118922	0.282629	0.282621	2.96208	0.345593	0.886876	1.19306	4.37975	0.19788
20NL66-1.03	377.7	0.0490158	0.00166278	0.282615	0.282603	2.32053	0.446692	0.919421	1.23395
20NL66-1.04	377.7	0.0321131	0.00114139	0.282646	0.282638	3.56677	0.360701	0.862037	1.15449	4.60379	0.184029
20NL66-1.05	377.7	0.0260574	0.000930661	0.28262	0.282614	2.70227	0.375094	0.893711	1.20963	4.27113	0.295331
20NL66-1.06	377.7	0.0316507	0.0011162	0.282618	0.282611	2.5917	0.374129	0.900684	1.21667
20NL66-1.07	377.7	0.0348113	0.00129448	0.282621	0.282611	2.62323	0.380894	0.901919	1.21466	4.28955	0.335809
20NL66-1.08	377.7	0.0251484	0.000933166	0.282622	0.282616	2.77709	0.364599	0.89077	1.20486	3.55359	0.236554
20NL66-1.09	377.7	0.0188109	0.00069175	0.282624	0.282619	2.90898	0.396523	0.882289	1.19645
20NL66-1.10	377.7	0.0300782	0.001103	0.28261	0.282603	2.31163	0.40112	0.911686	1.23452	4.07566	0.228477
20NL66-1.11	1165	0.0162698	0.0005946	0.282125	0.282112	2.46808	0.427961	1.57171	1.83713
20NL66-1.12	377.7	0.0378133	0.00135825	0.282601	0.282592	1.92619	0.412645	0.930842	1.25907
20NL66-1.13	377.7	0.0369933	0.00135924	0.282607	0.282597	2.11289	0.365533	0.923351	1.24718	4.97122	0.387809
20NL66-1.14	377.7	0.0515584	0.00181028	0.282612	0.282599	2.196	0.359753	0.926661	1.24189
20NL66-1.15	618.1	0.0295321	0.00111801	0.282479	0.282466	2.78695	0.386195	1.09793	1.3916
20NL66-1.16	377.7	0.0327463	0.00121975	0.282633	0.282625	3.09284	0.368513	0.882051	1.18472	4.33576	0.16865
20NL66-1.17	377.7	0.0485373	0.00179543	0.282613	0.2826	2.22277	0.829743	0.925351	1.24018
20NL66-1.18	377.7	0.0196388	0.000732378	0.282617	0.282611	2.62556	0.312604	0.894042	1.21452	3.48383	0.22167
